# Supplementary figures and images for: Standardized high-throughput biomonitoring using DNA metabarcoding: Strategies for the adoption of automated liquid handlers
Source: PubMed Central journal article supplement — Environ Sci Ecotechnol. 2021 Aug 30;8:100122. doi: 10.1016/j.ese.2021.100122 (PMC9488008; doi:10.1016/j.ese.2021.100122), 2021-08-30

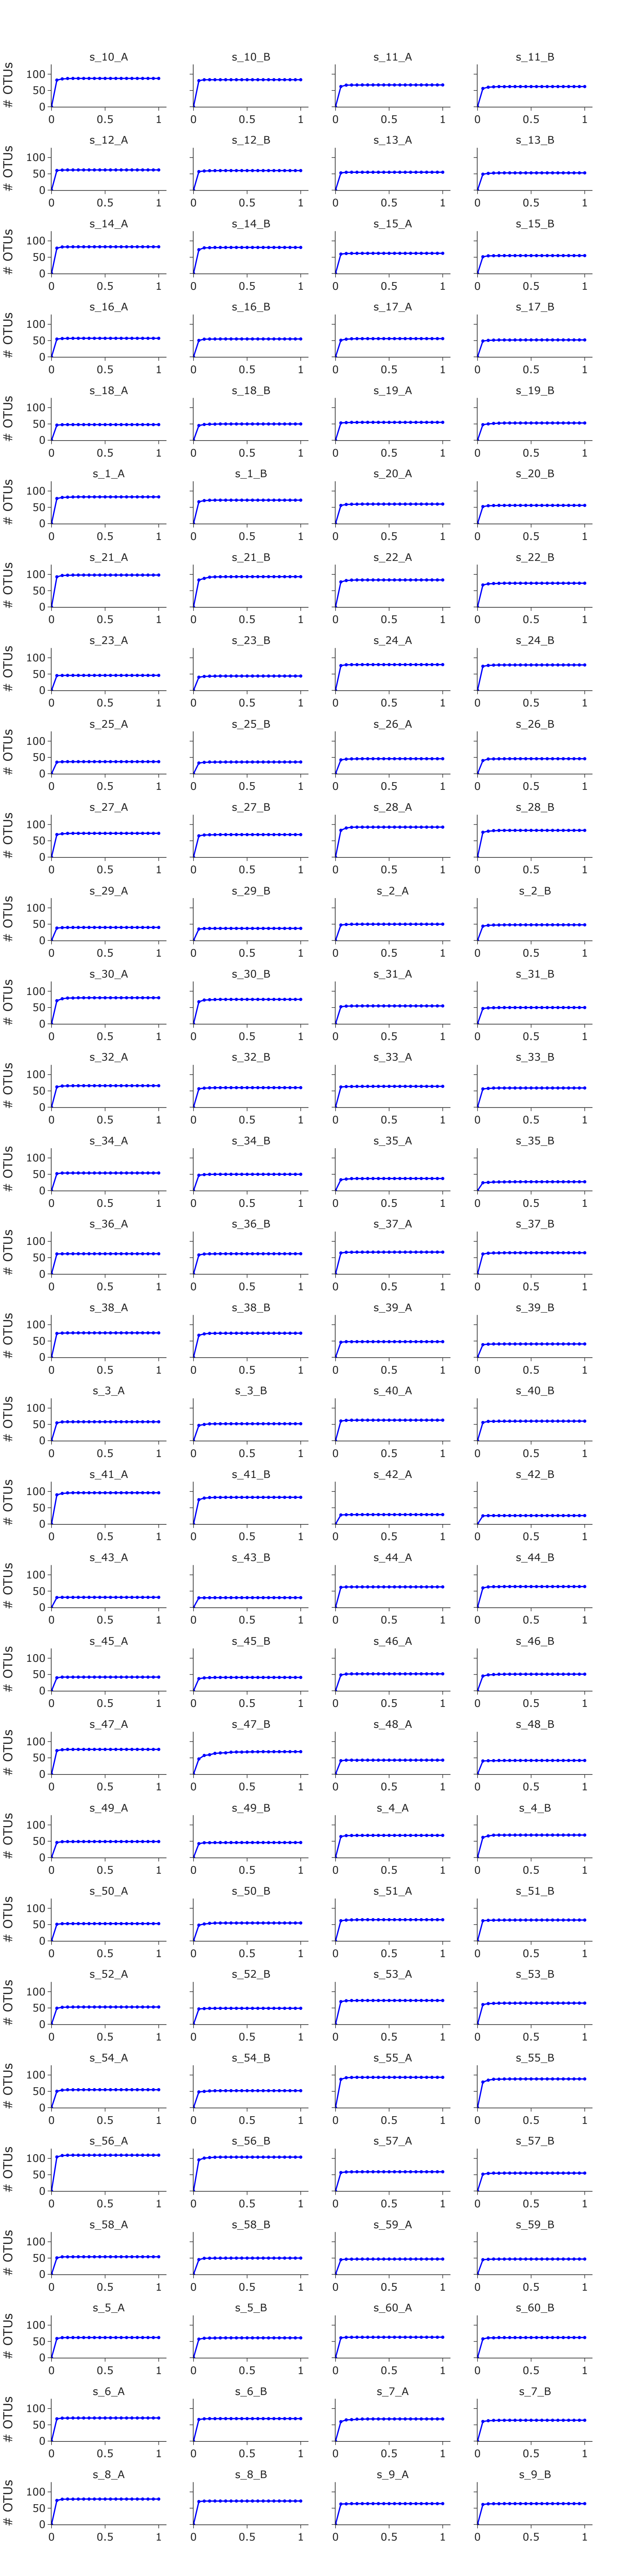

Supplement: mmc2.pdf [file mmc2.pdf]

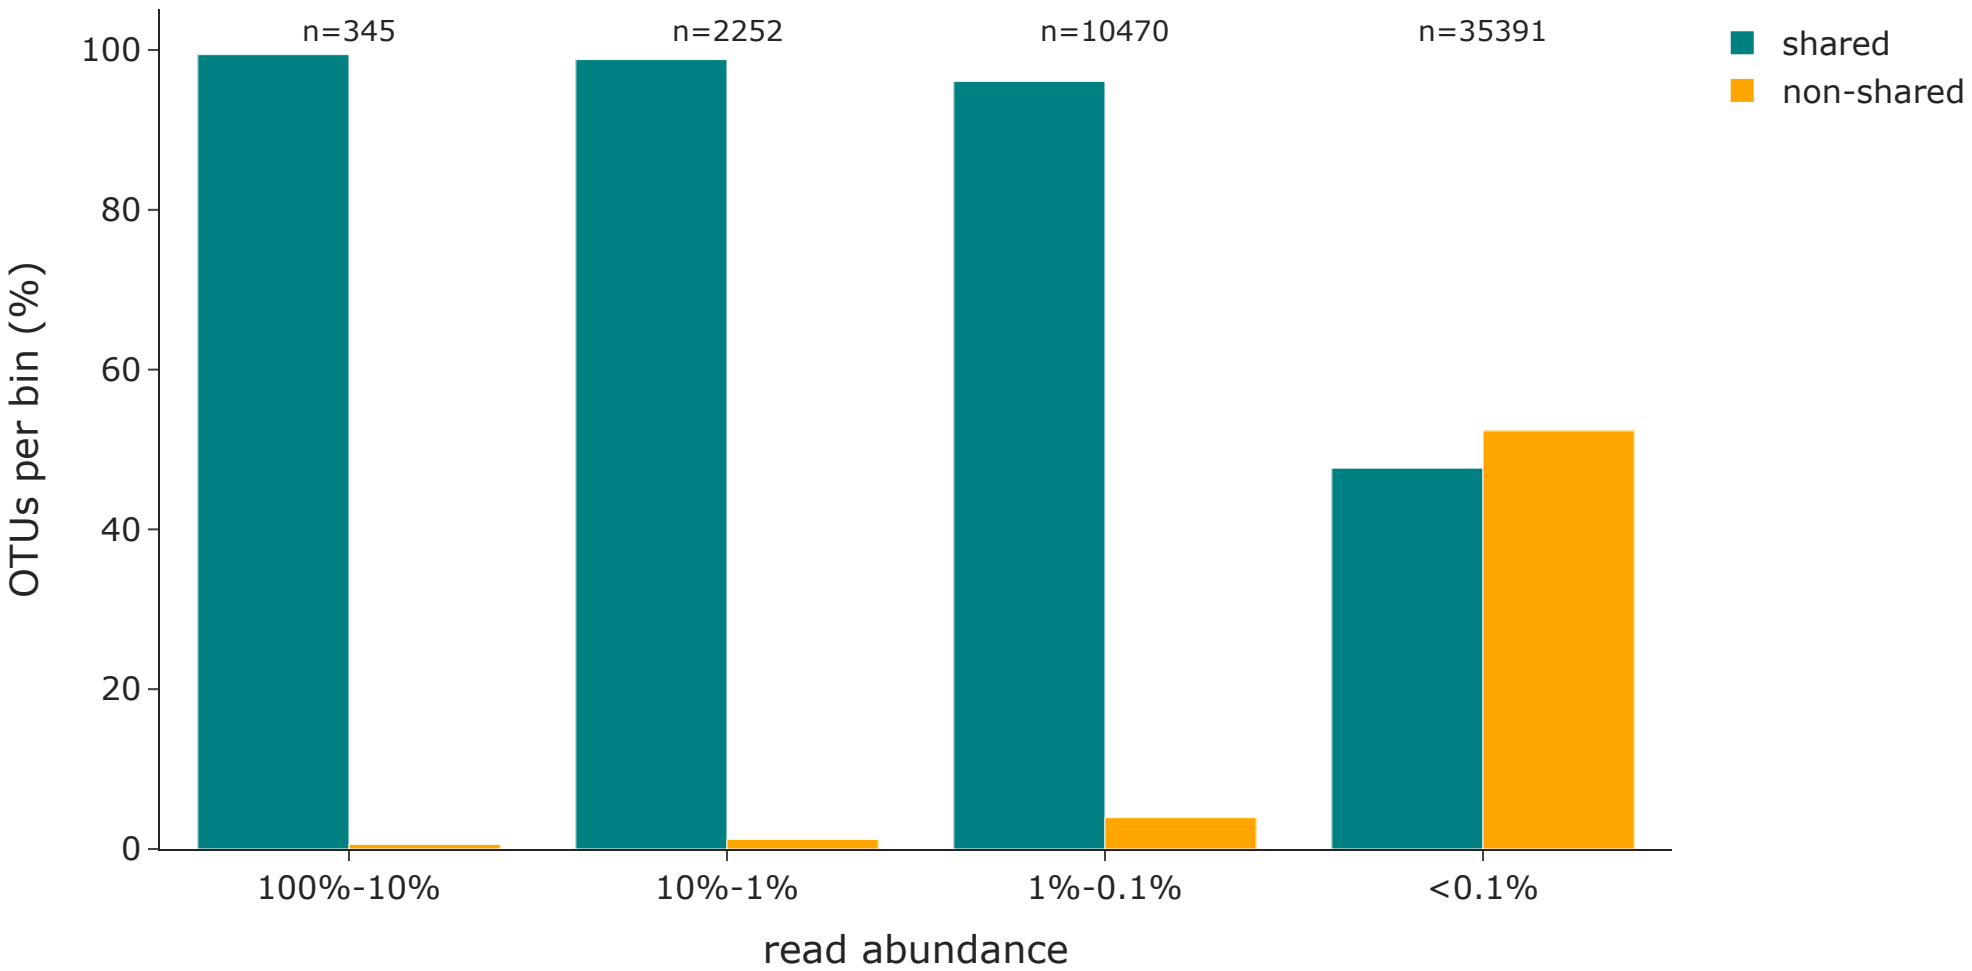

Supplement: mmc3.pdf [file mmc3.pdf]

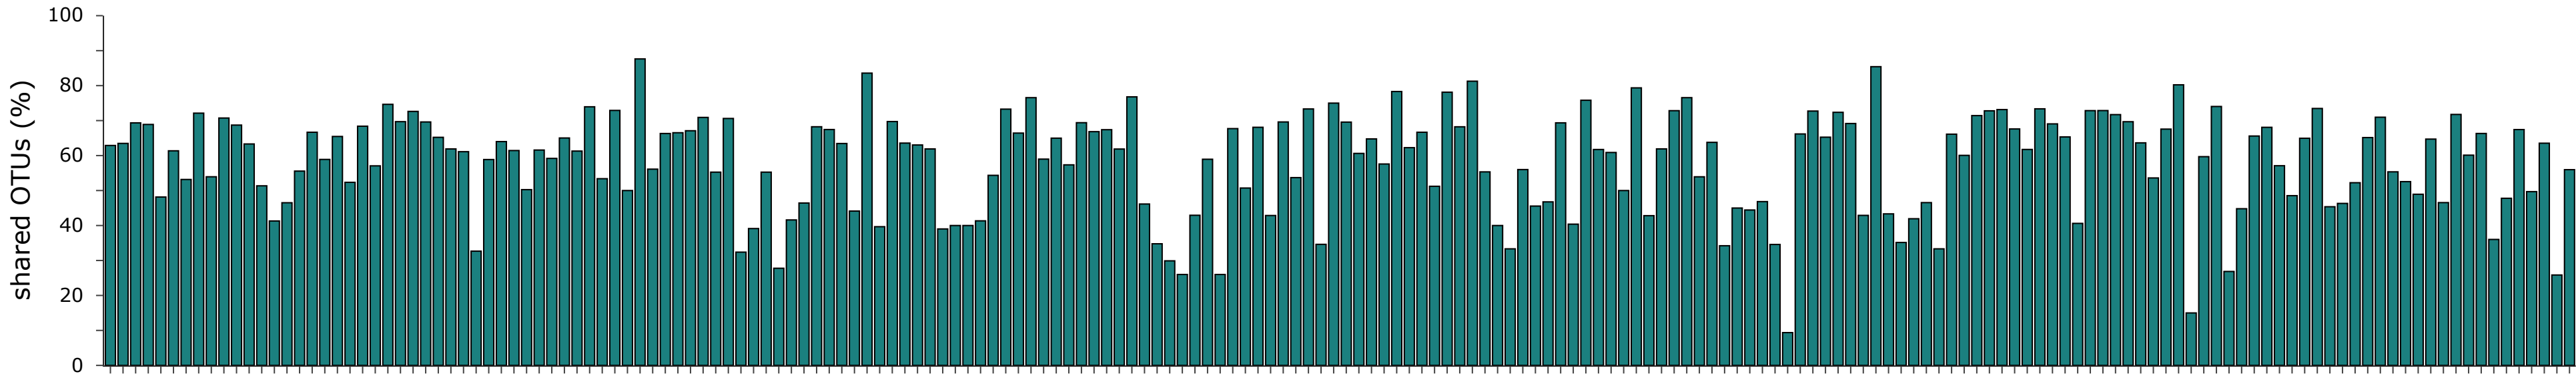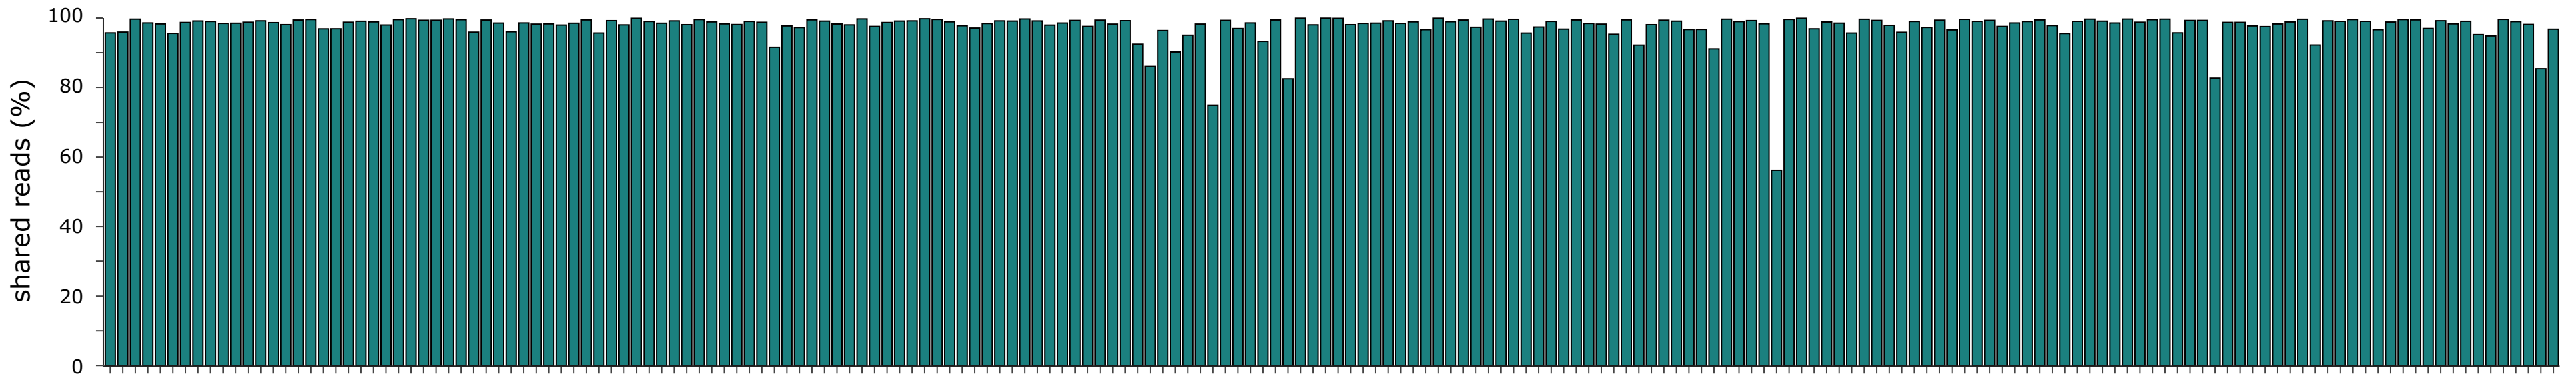

samples

Supplement: mmc4.pdf [file mmc4.pdf]

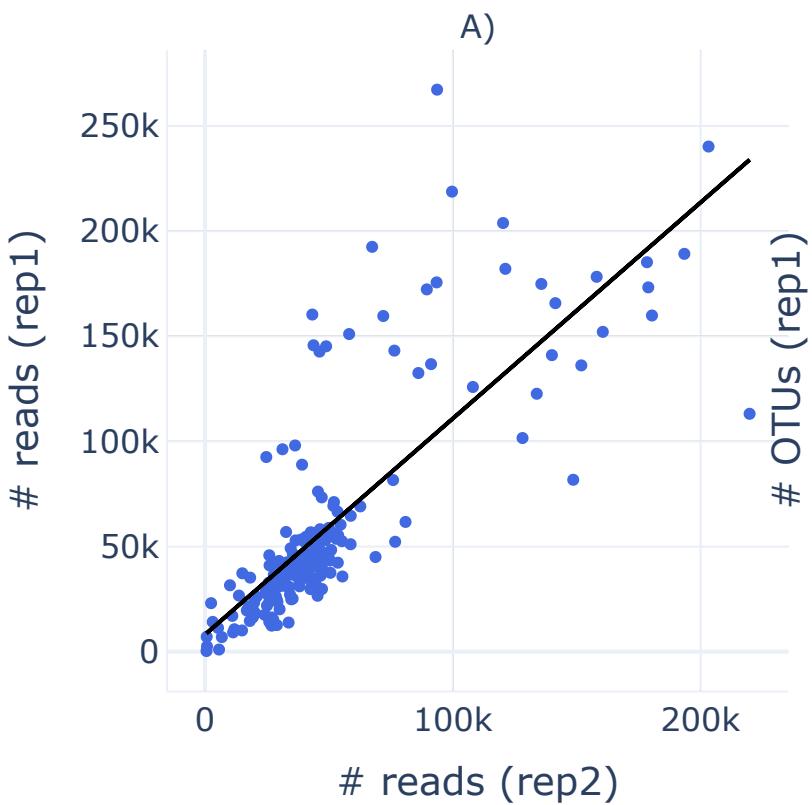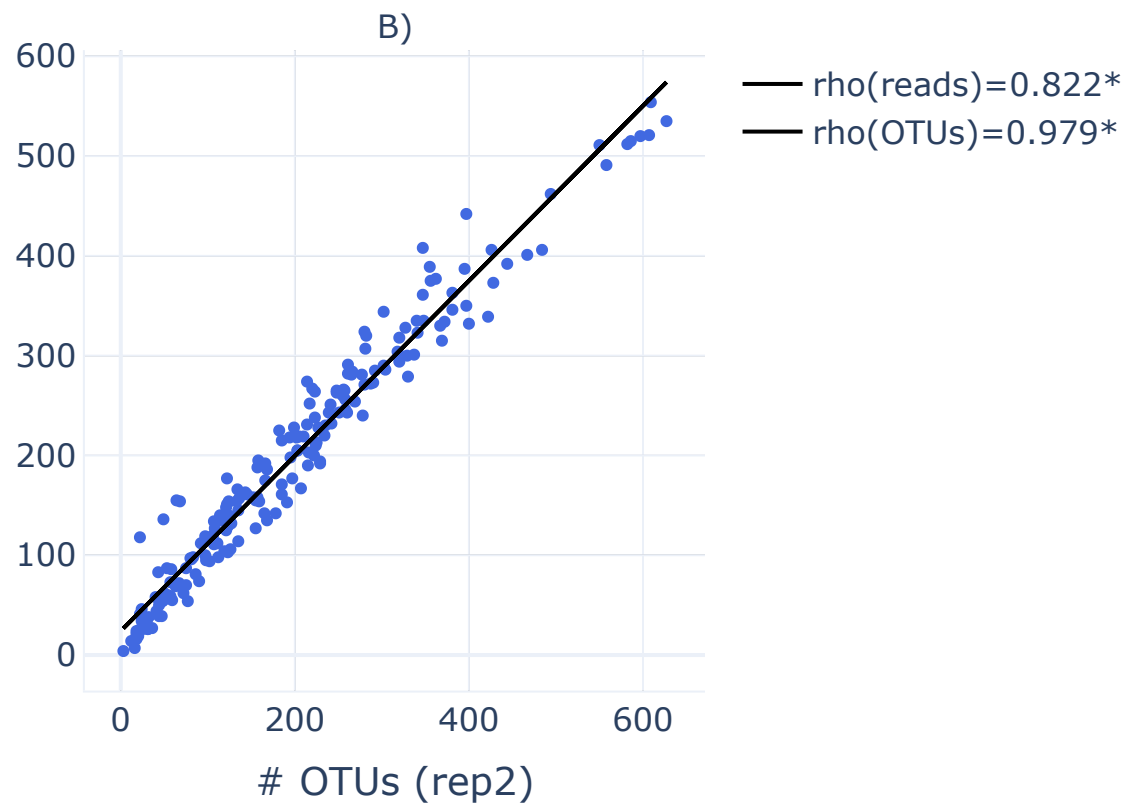

Supplement: mmc5.pdf [file mmc5.pdf]

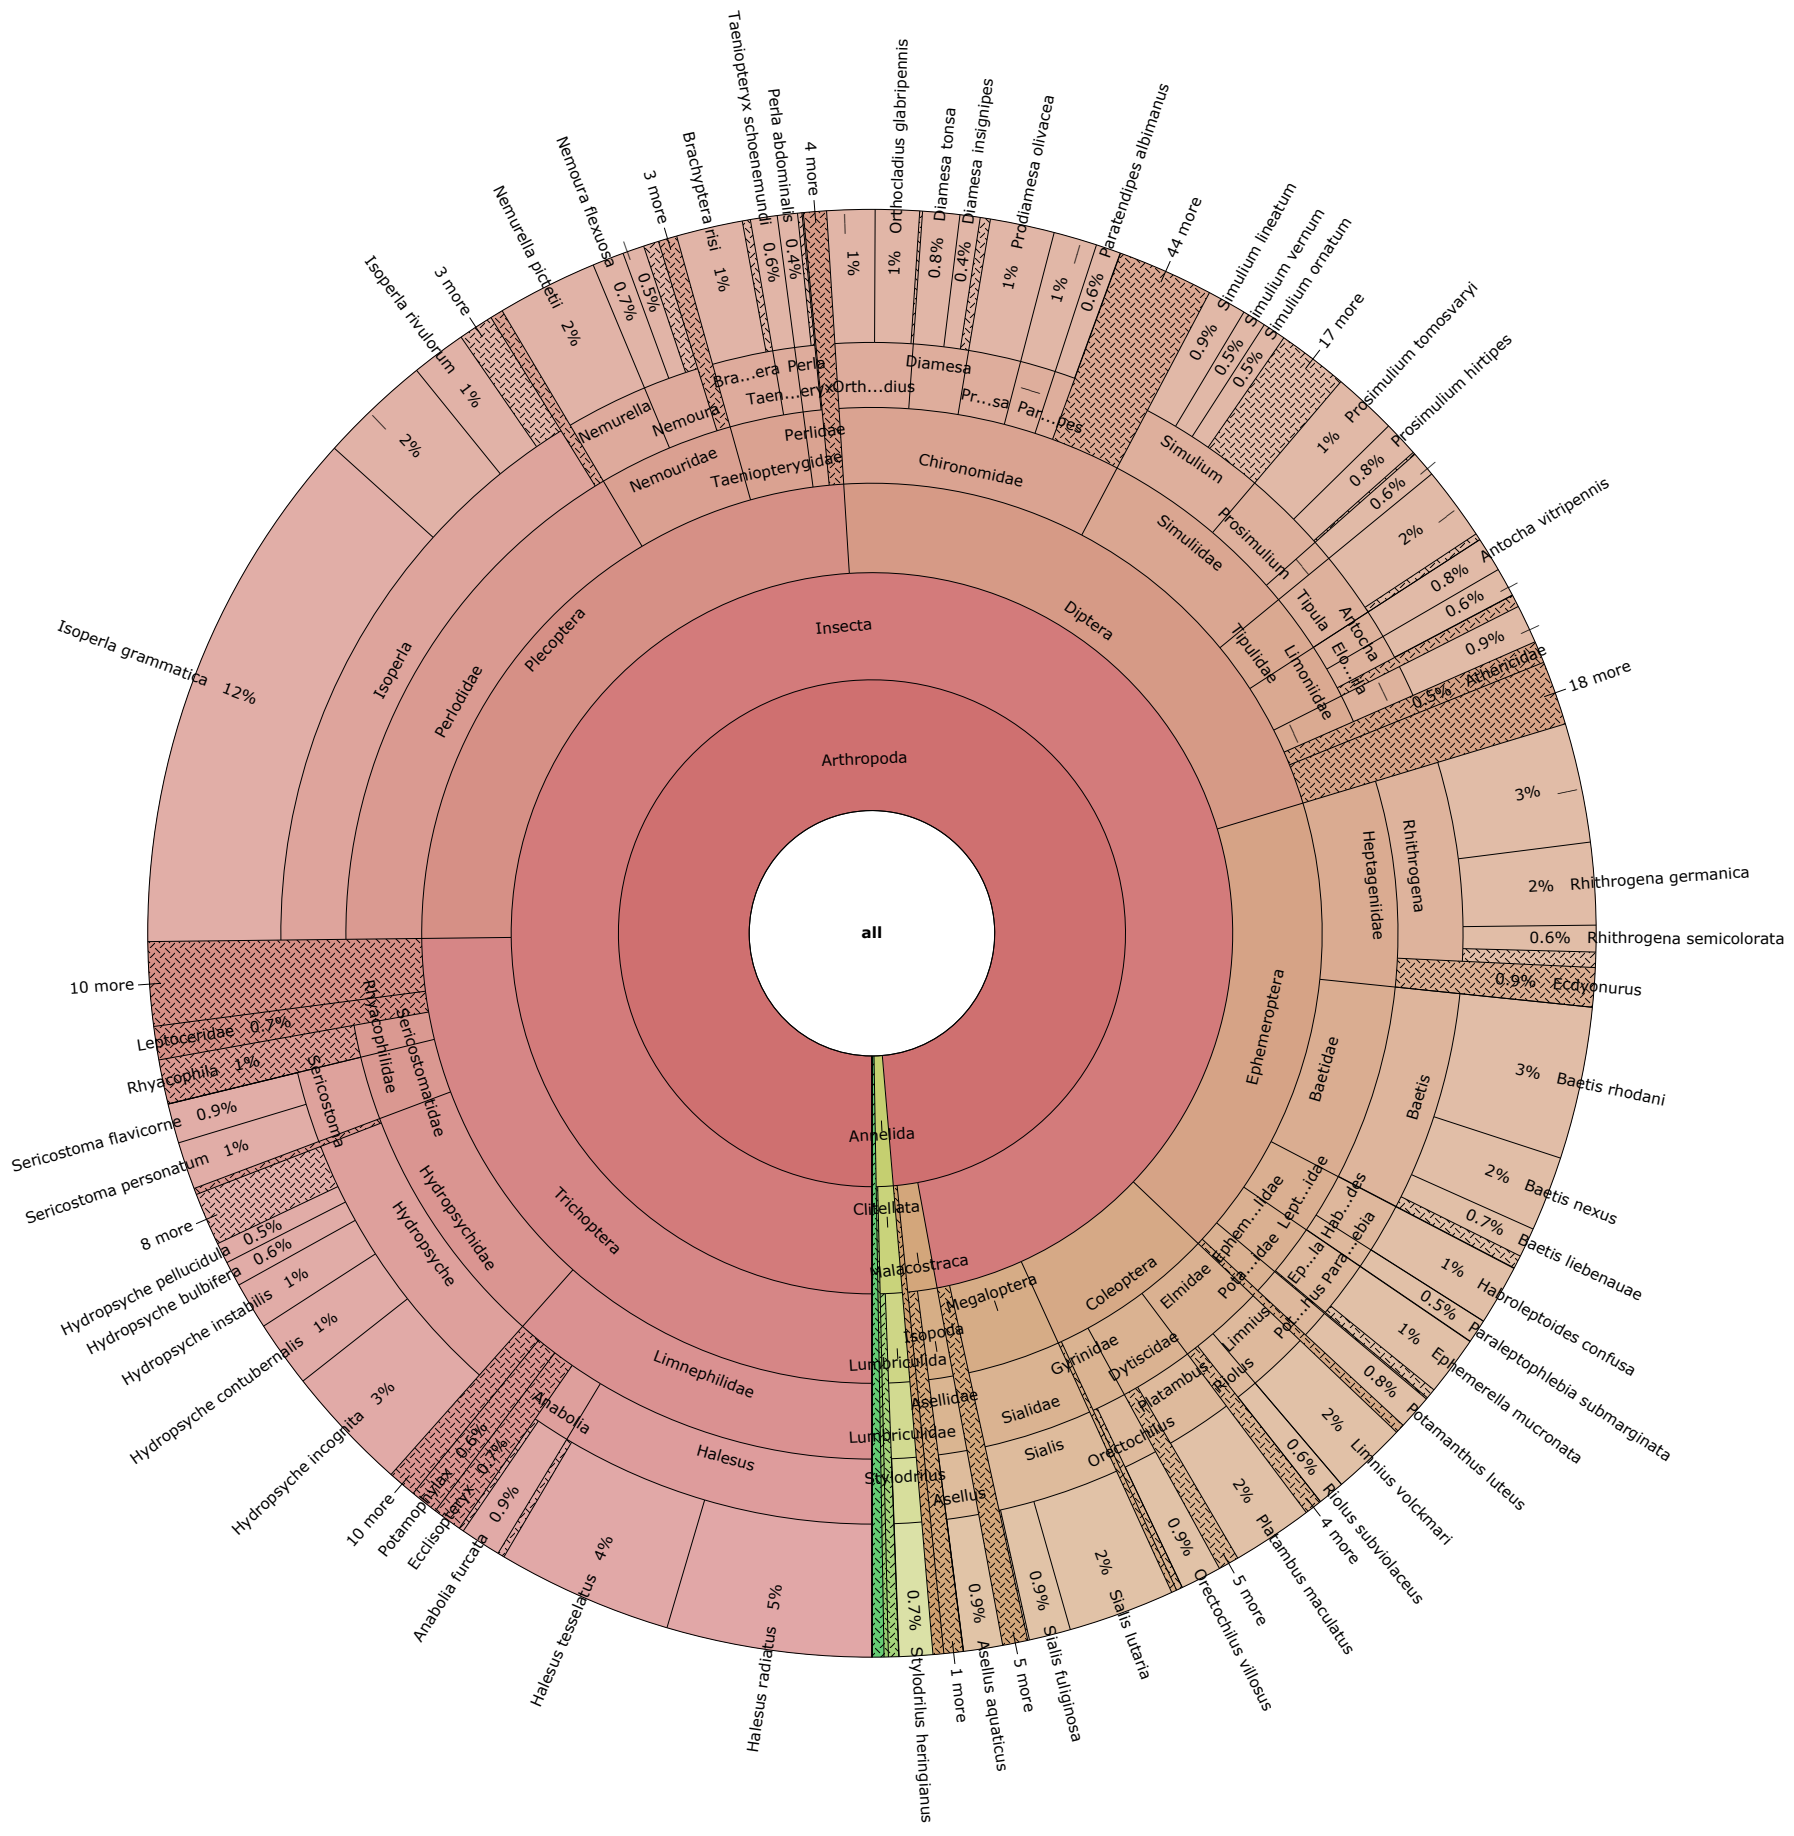

Supplement: mmc6.pdf [file mmc6.pdf]
